# Supplementary material for: Metal–organic-framework embellished through ion etching method for highly enhanced electrochemical oxygen evolution reaction catalysis
Source: Royal Society of Chemistry journal article supplement (doi:10.1039/d2qm00388k), 2022-01-01
Supplement: d2qm00388k1.pdf [file d2qm00388k1.pdf]

## Electronic Supplementary Information

### Metal-Organic-Framework Embellished through Ion Etching Method for Highly Enhanced Electrochemical Oxygen Evolution

Qiuxiang Mou,<sup>a</sup> Zhenhang Xu,<sup>b</sup> Wei Zuo,<sup>b</sup> Tianyu Shi,<sup>b</sup> Erlei Li,<sup>a</sup> Gongzhen Cheng,<sup>b</sup> Xinghai Liu,<sup>a</sup>  
Huaming Zheng,<sup>\*c</sup> Houbin Li,<sup>\*a</sup> and Pingping Zhao<sup>\*a</sup>

<sup>a</sup> *Research Center of Graphic Communication, Printing and Packaging, Wuhan University, Wuhan, 430072, China.*

<sup>b</sup> *College of Chemistry and Molecular Sciences, Wuhan University, Wuhan, 430072, China.*

<sup>c</sup> *School of Material Sciences & Engineering, Wuhan Institute of Technology, Wuhan, 430073 Hubei, P.R. China.*

## **Table of contents**

|                               |    |
|-------------------------------|----|
| 1. Supplementary Figures..... | 1  |
| 2. Supplementary Tables ..... | 12 |
| 3. Reference .....            | 14 |

## 1. Supplementary Figures

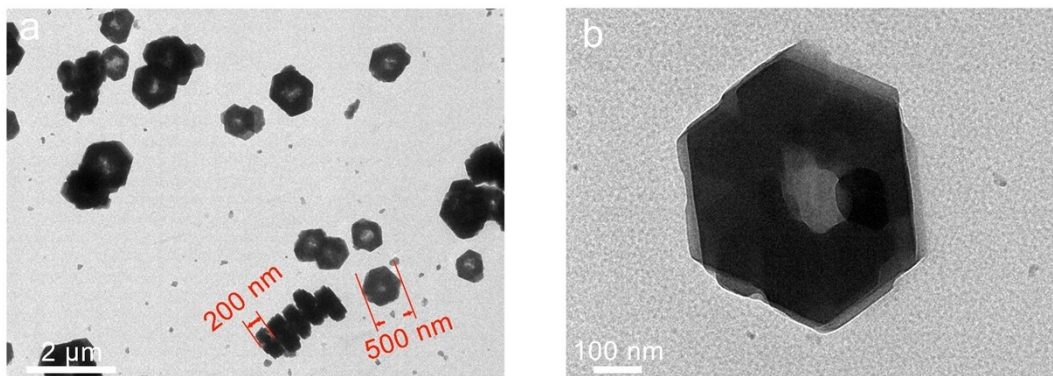

**Fig. S1.** TEM images of Ni MOF.

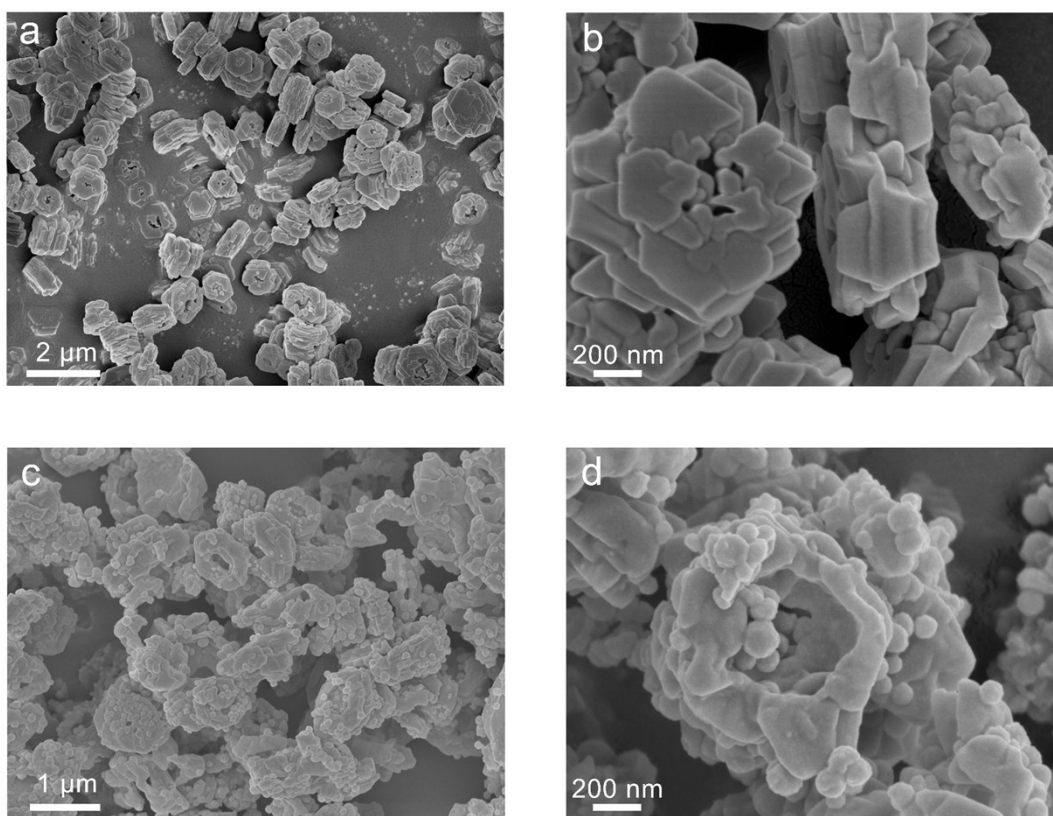

**Fig. S2.** SEM images of (a) (b) Ni MOF and (c) (d) Ni-MOF-Fe-2.

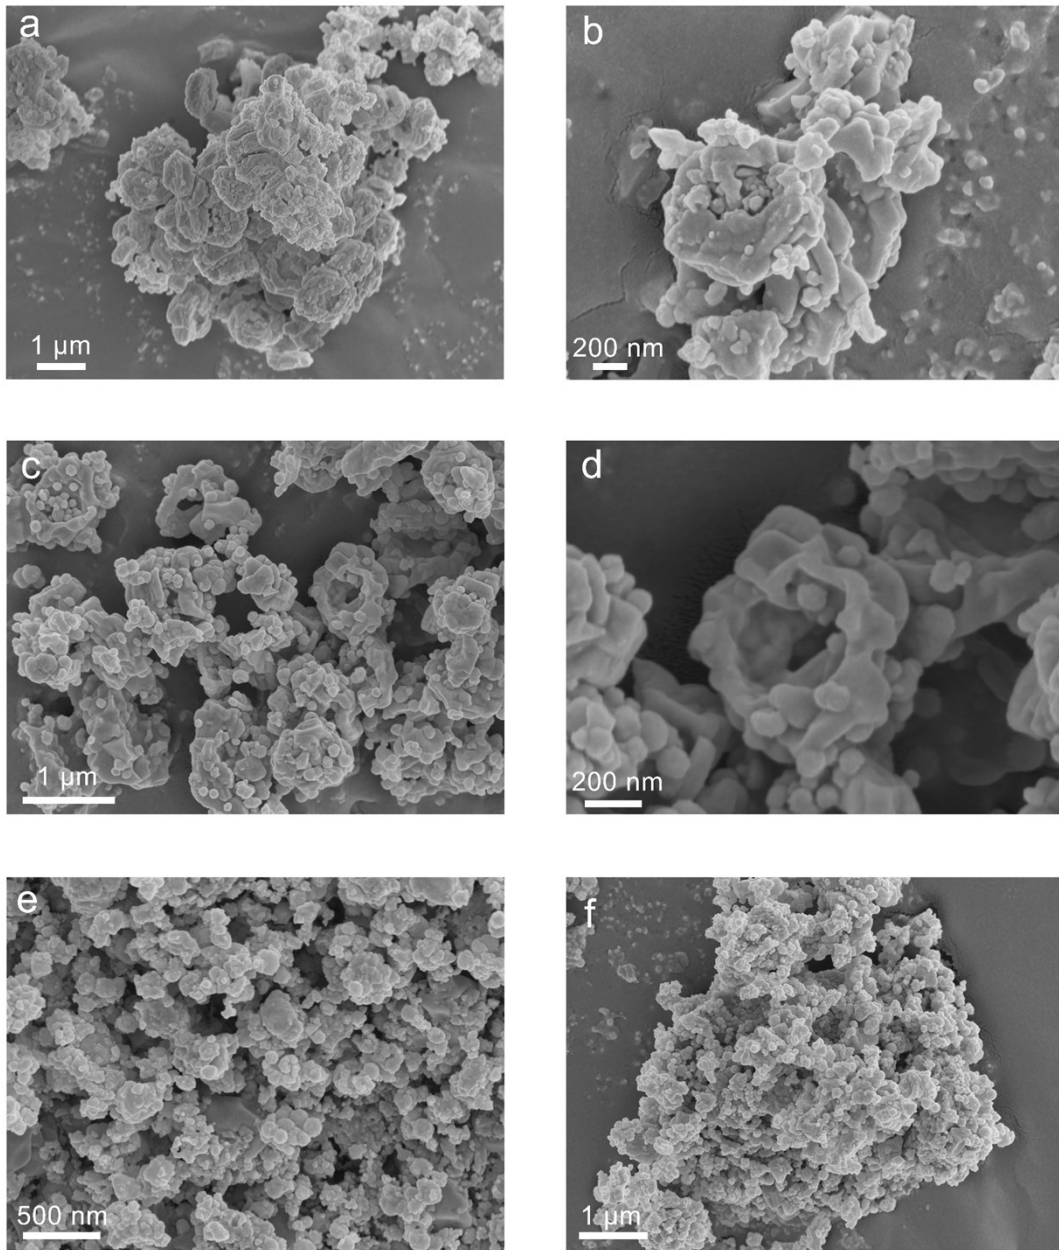

**Fig. S3.** SEM images of (a) (b) Ni-MOF-Fe-1, (c) (d) Ni-MOF-Fe-2 and (e) (f) Ni-MOF-Fe-3.

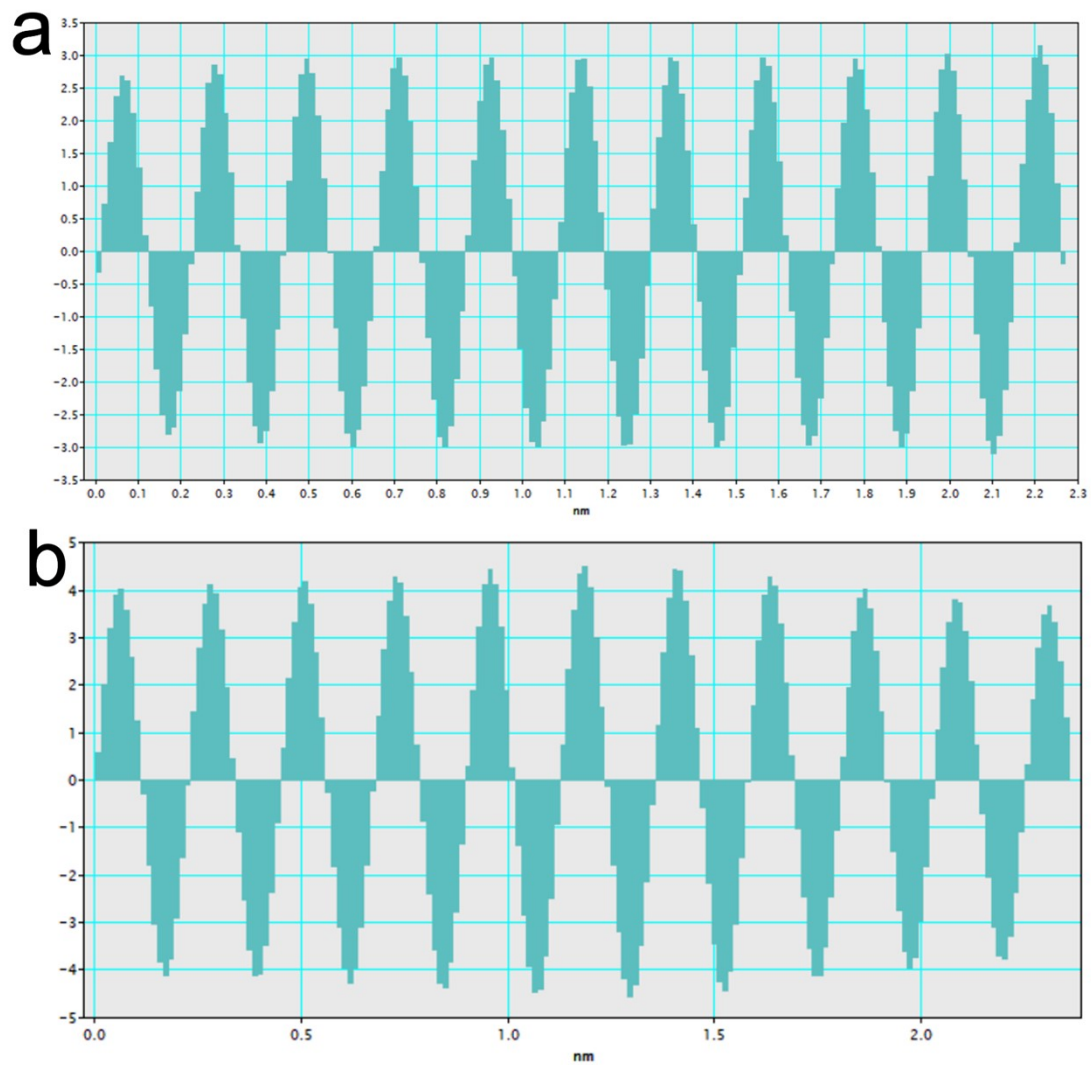

**Fig. S4.** Contrast intensity profile of the (a) (-121) plane and (b) (-120) plane.

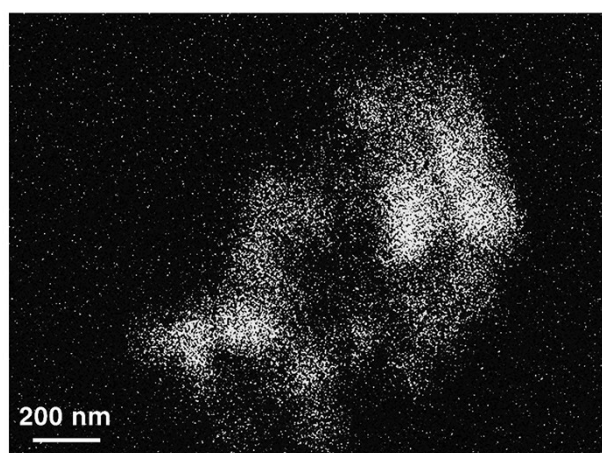

**Fig. S5.** HAADF-STEM image of Ni-MOF-Fe-2.

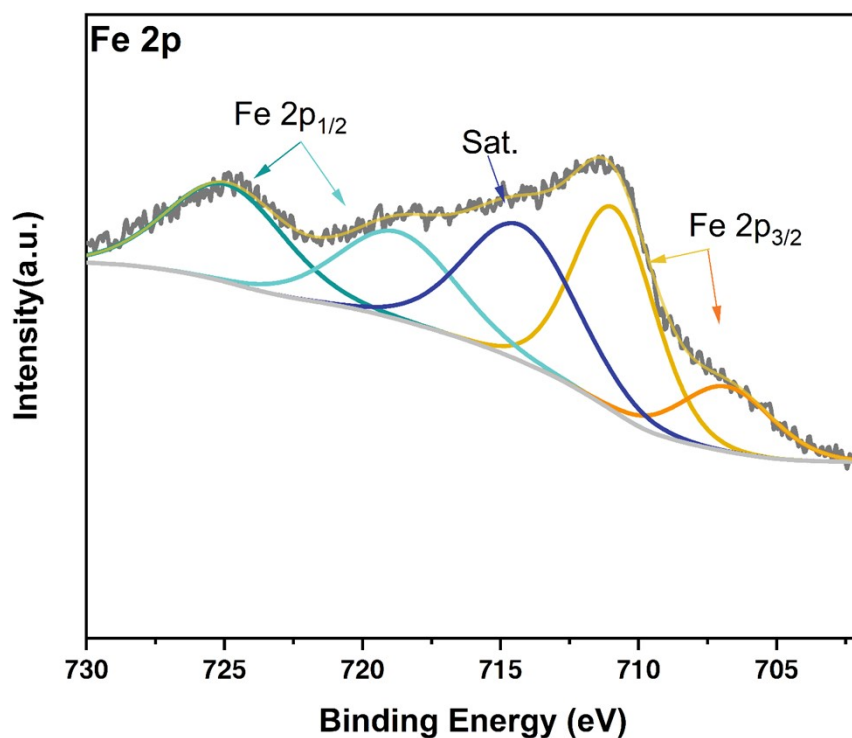

**Fig. S6.** High-resolution XPS spectrum of Fe 2p in Ni-MOF-Fe-2.

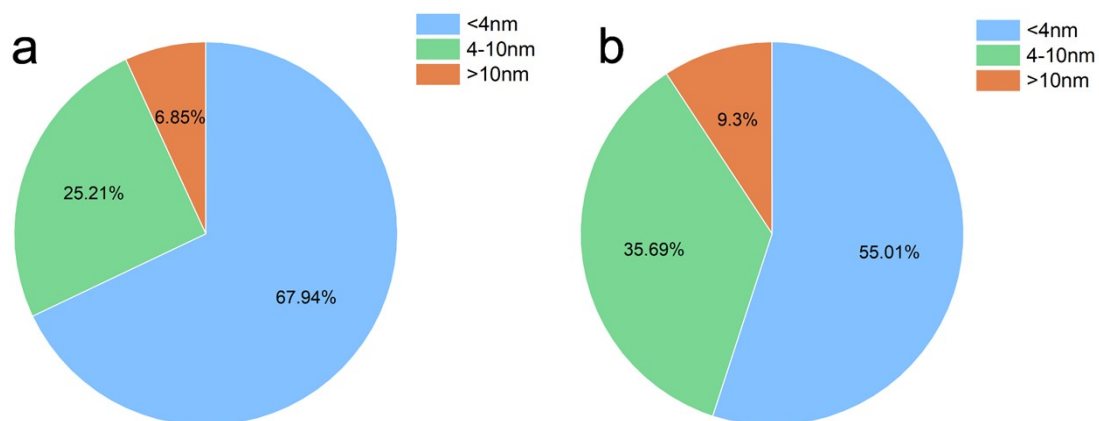

**Fig. S7.** Pie charts of pore width in (a) Ni MOF and (b) Ni-MOF-Fe-2, where the pore width proportion of Ni-MOF-Fe-2 showed a wider distribution than that of Ni MOF, and more big pores generated in Ni-MOF-Fe-2, intuitively indicating that the structure of MOF etched by iron ions has been effectively changed.

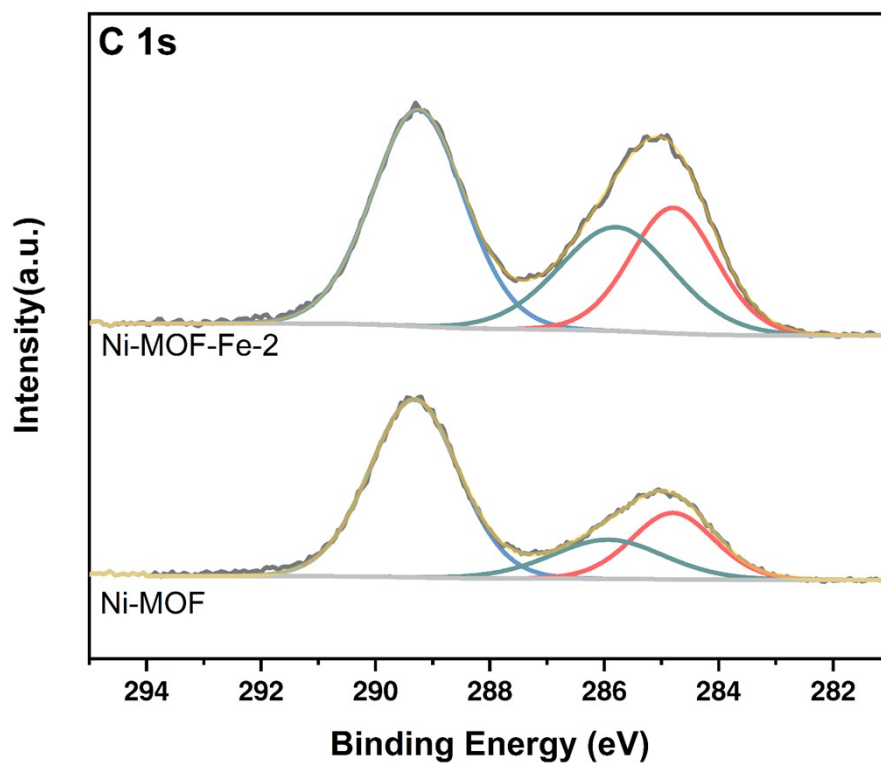

**Fig. S8.** High-resolution XPS spectra of C 1s in Ni MOF and Ni-MOF-Fe-2.

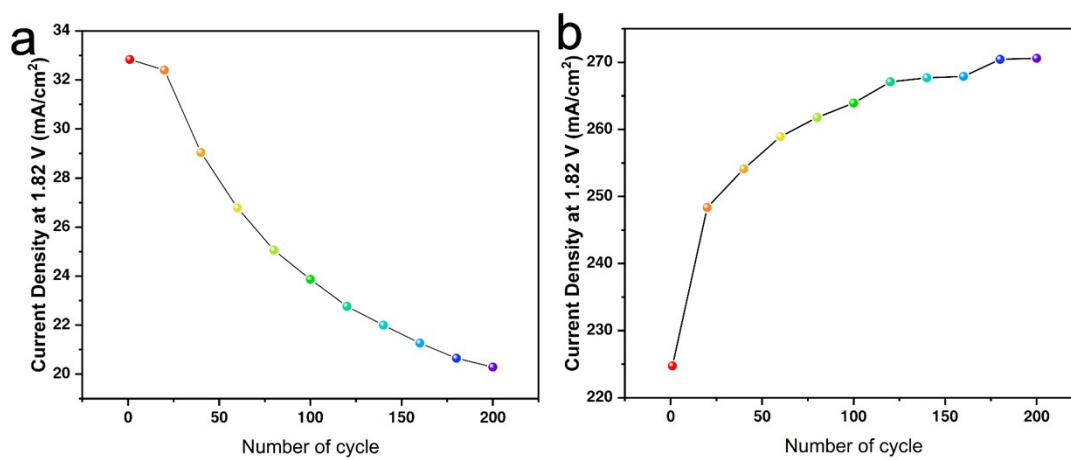

**Fig. S9.** OER activity at 1.66 V (vs. RHE) for (a) Ni MOF and (b) Ni-MOF-Fe-2.

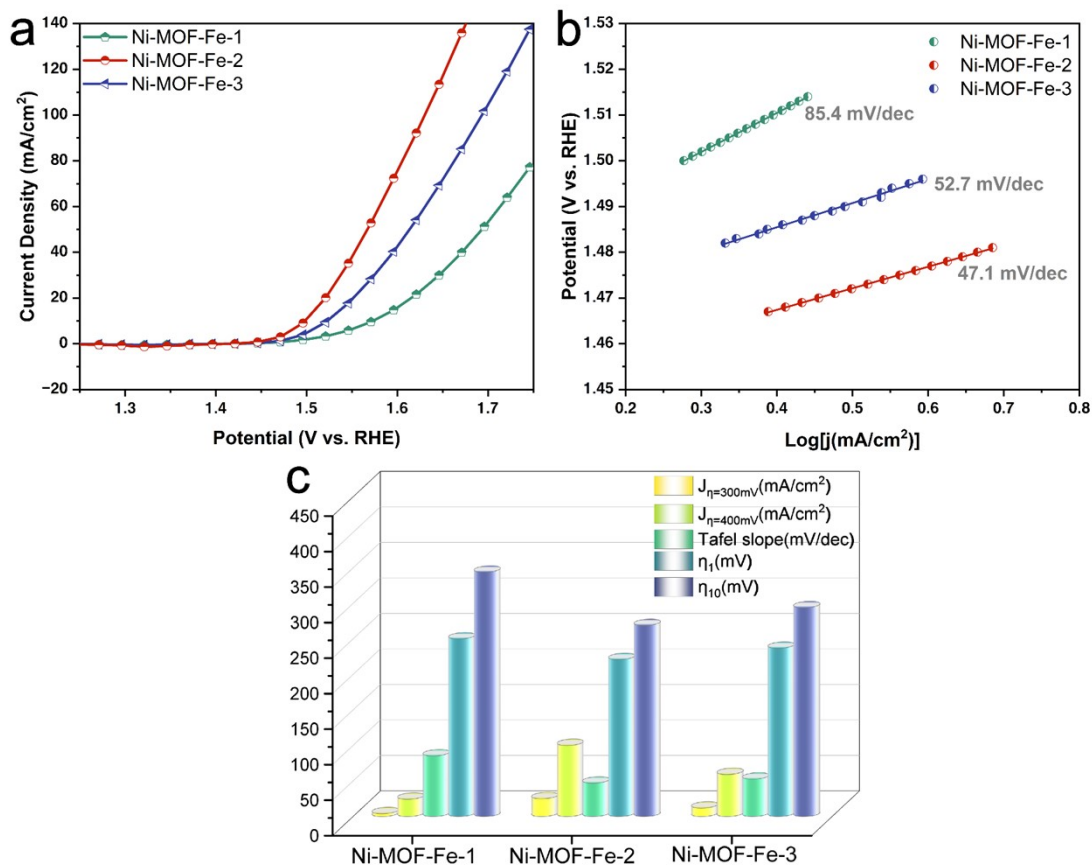

**Fig. S10.** OER activity of the Fe etching catalysts. (a) LSV OER polarization curves of the catalysts without  $iR$ -correction. (b) Corresponding Tafel slopes in (a). (c) Comparison of the overpotentials at 1 mA/cm<sup>2</sup> ( $\eta_1$ ) and 10 mA/cm<sup>2</sup> ( $\eta_{10}$ ), the current densities under an overpotential of 300 mV and 400 mV, and the Tafel slopes obtained from the catalysts.

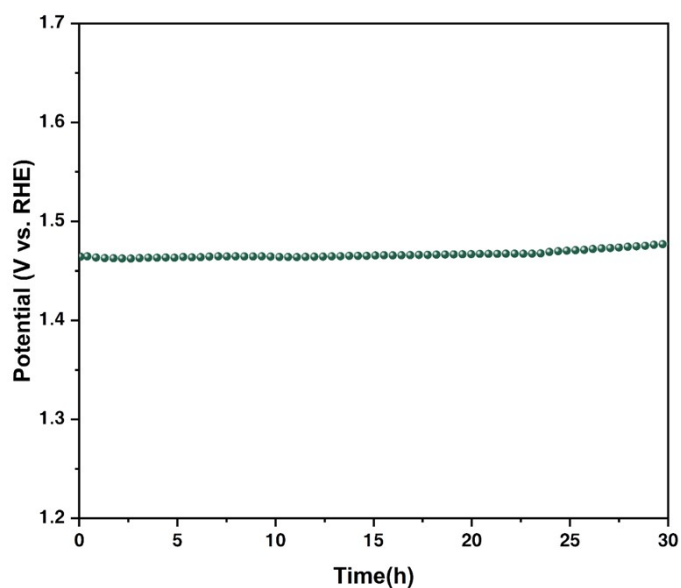

**Fig. S11.** Chronopotentiometric curve of Ni-MOF-Fe-2 at 10 mA/cm<sup>2</sup>.



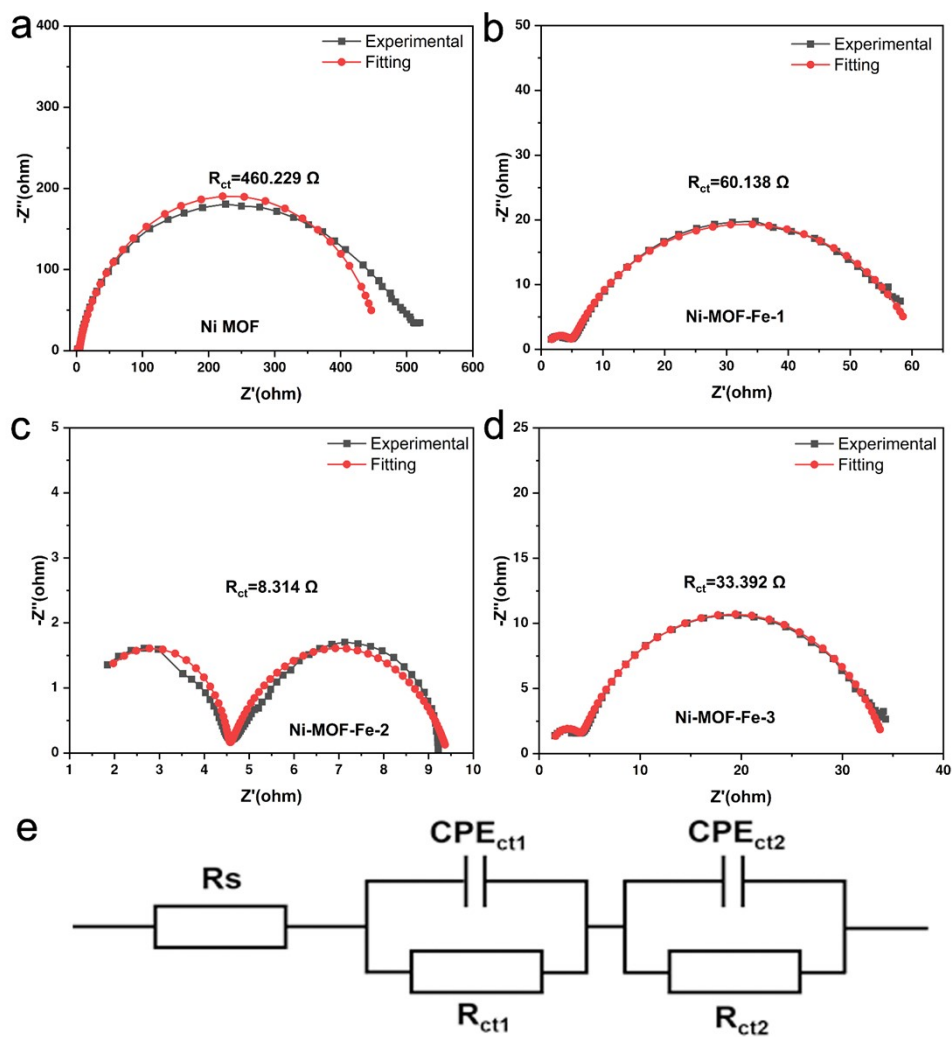

**Fig. S12.** Experimental data and fitting results of (a) Ni MOF, (b) Ni-MOF-Fe-1, (c) Ni-MOF-Fe-2 and (d) Ni-MOF-Fe-3. (e) The equivalent circuit for modeling the measured electrochemical response in this manuscript.

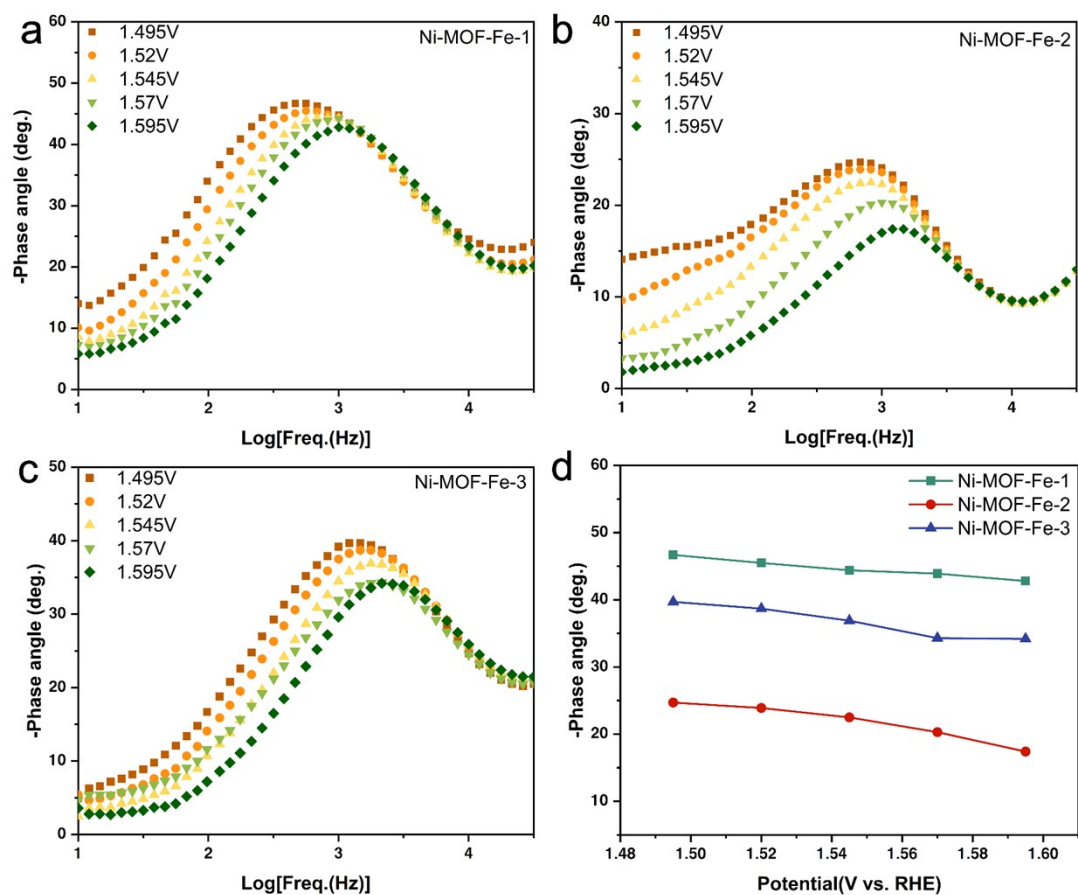

**Fig. S13.** Bode plots of (a) Ni-MOF-Fe-1, (b) Ni-MOF-Fe-2 and (c) Ni-MOF-Fe-3 obtained under different potentials. (d) Potential dependence of the phase angle of the samples.

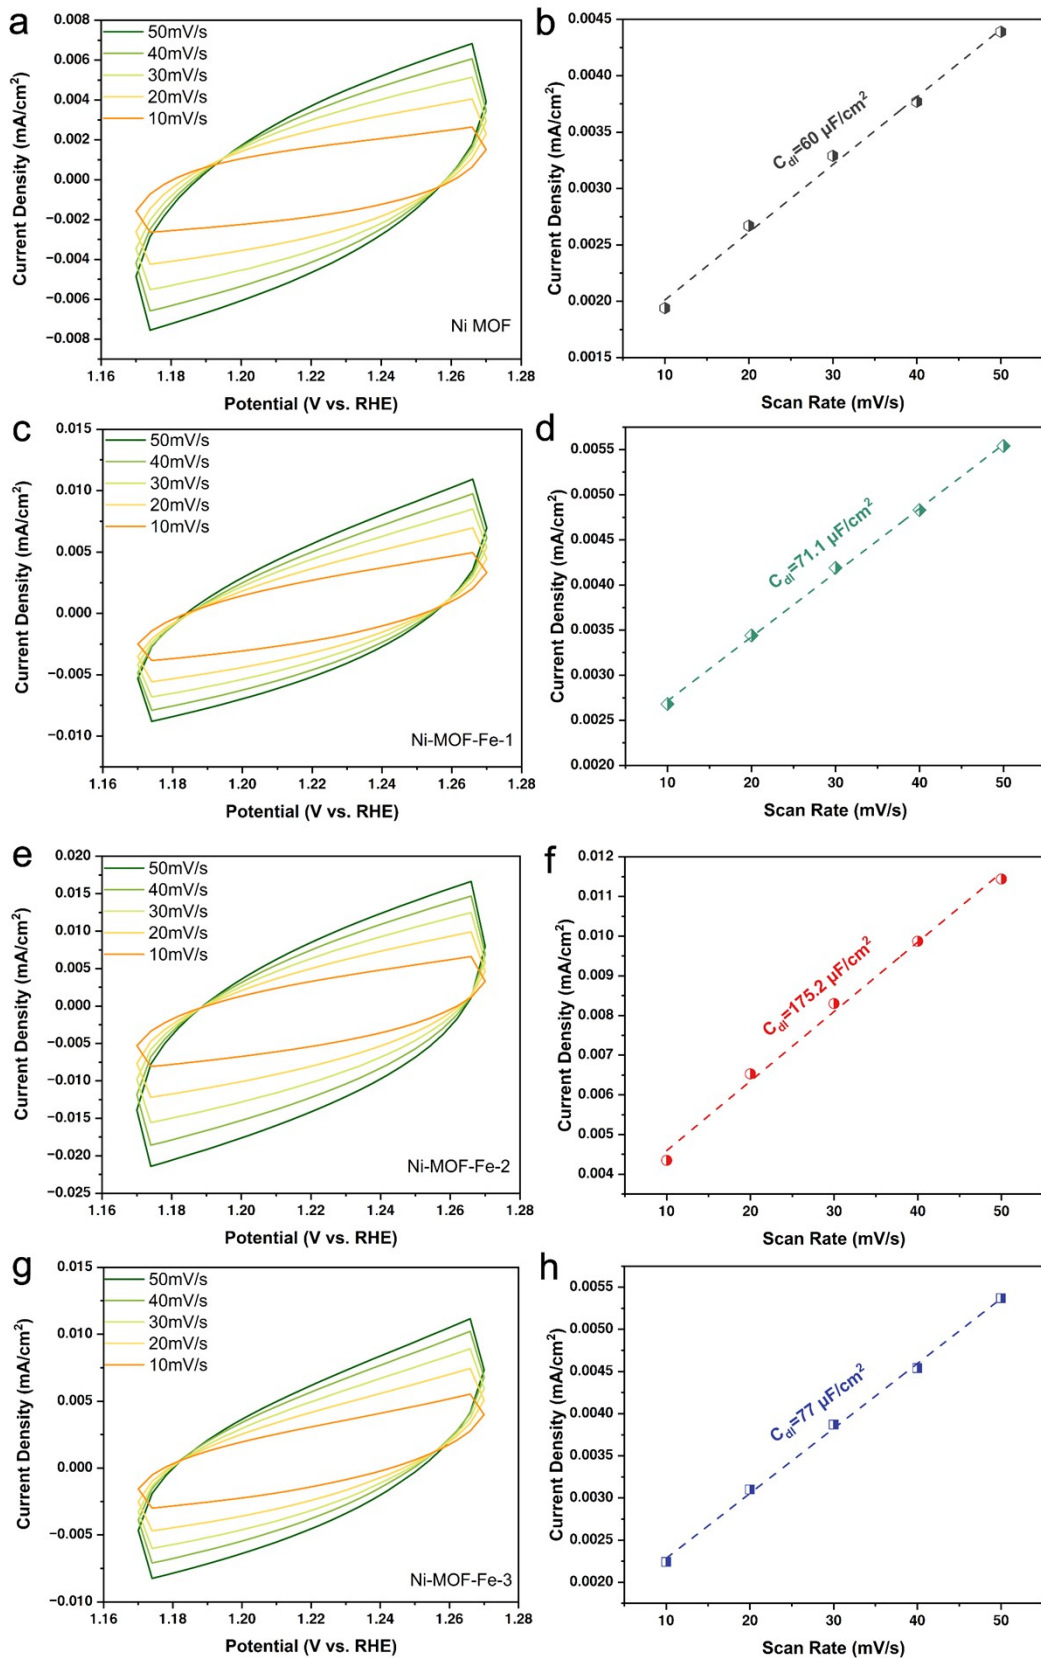

**Fig. S14.** CV curves and current density differences at 1.222 V vs. RHE against the scan rate for the estimation of  $C_{dl}$  of the samples. (a) (b) Ni-MOF, (c) (d) Ni-MOF-Fe-1, (e) (f) Ni-MOF-Fe-2. (g) (h) Ni-MOF-Fe-3.

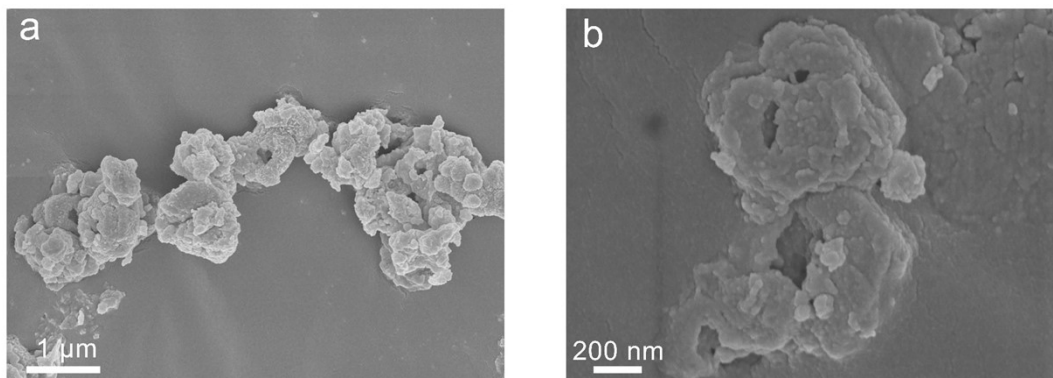

**Fig. S15.** SEM images of the post-OER Ni-MOF-Fe-2.

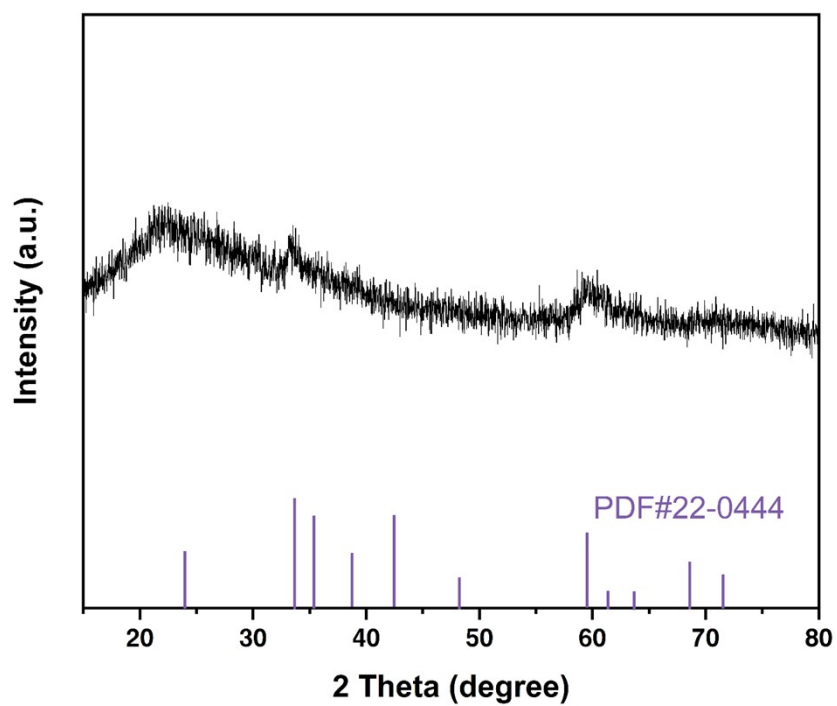

**Fig. S16.** XRD pattern of the post-OER Ni-MOF-Fe-2.

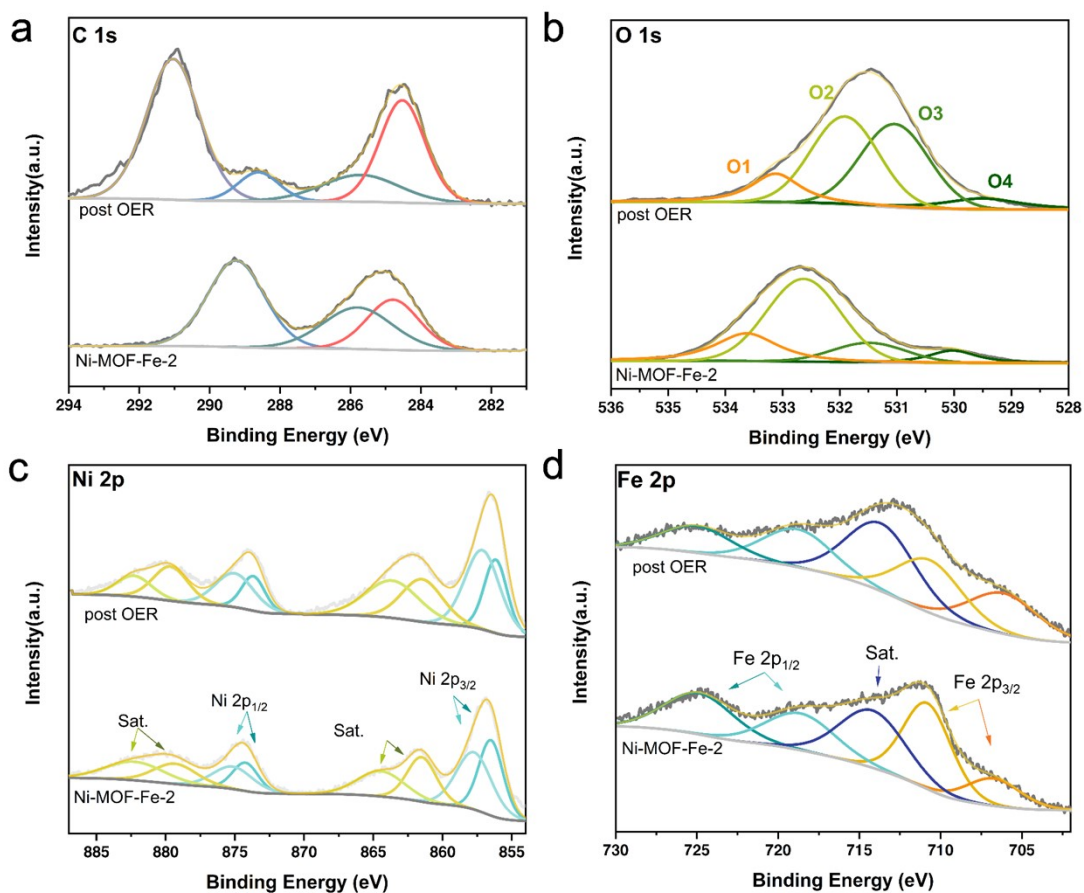

**Fig. S17.** High-resolution XPS spectra of (a) C 1s, (b) O 1s (c) Ni 2p and (d) Fe 2p of Ni-MOF-Fe-2 before and after OER process.

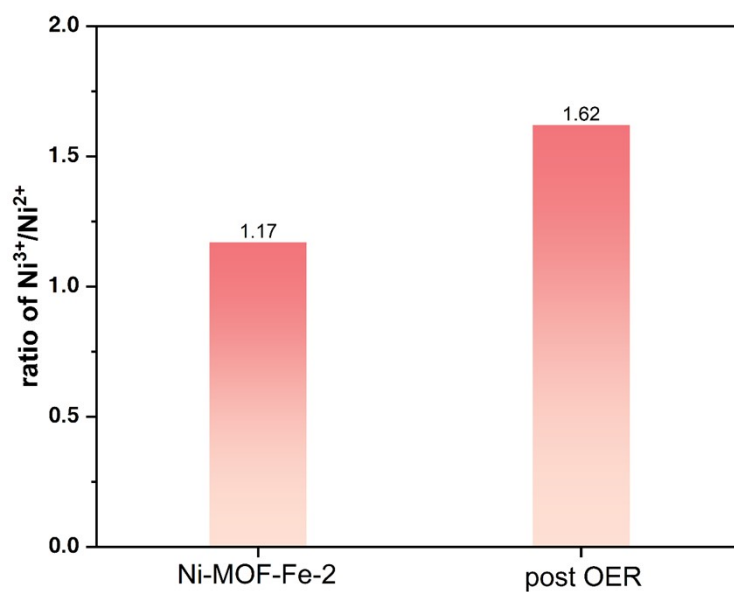

**Fig. S18.** Ratio of Ni<sup>3+</sup>/Ni<sup>2+</sup> in Ni-MOF-Fe-2 before and after OER process.

## 2. Supplementary Tables

**Table S1.** EDX results of Ni-MOF-Fe-2.

| Element | Weight(%) | Atomic(%) | Net Error(%) |
|---------|-----------|-----------|--------------|
| O K     | 37.01     | 67.82     | 0.94         |
| Fe K    | 28.46     | 14.94     | 1.05         |
| Ni K    | 34.53     | 17.24     | 0.17         |

**Table S2.** Comparison of OER performance of catalysts in this work with reported electrocatalysts.

| Catalyst                                         | $\eta$ (mV) at<br>10 mA cm <sup>-2</sup> | Tafel Slope<br>(mV dec <sup>-1</sup> ) | Electrolyte | Loading<br>mass ( $\mu$ g<br>cm <sup>-2</sup> ) | Reference |
|--------------------------------------------------|------------------------------------------|----------------------------------------|-------------|-------------------------------------------------|-----------|
| Ni-MOF-Fe-2                                      | 269                                      | 47.1                                   | 1 M KOH     | 300                                             | This work |
| Ni-MOF-Fe-1                                      | 344                                      | 85.4                                   | 1 M KOH     | 300                                             |           |
| Ni-MOF-Fe-3                                      | 294                                      | 52.7                                   | 1 M KOH     | 300                                             |           |
| Ni SAs@S/N-CMF                                   | 285                                      | 50.8                                   | 1 M KOH     | 750                                             | 1         |
| BCN/ZrO <sub>2</sub>                             | 301                                      | 75                                     | 1 M KOH     | 141                                             | 2         |
| Ru@NiV-LDH                                       | 272                                      | 60                                     | 1 M KOH     | 100                                             | 3         |
| FeNi/(FeNi) <sub>9</sub> S <sub>8</sub> /N       | 283                                      | 64.03                                  | 1 M KOH     | 420                                             | 4         |
| CoFe-LDH/GP                                      | 252                                      | 61                                     | 1 M KOH     | 6500                                            | 5         |
| 3Co-LaMOH O <sub>V</sub> @NC                     | 330                                      | 129                                    | 0.1 M KOH   | 500                                             | 6         |
| CoNi-SAs/NC                                      | 340                                      | 58.7                                   | 1 M KOH     | 1400                                            | 7         |
| CO-Fe <sub>2</sub> O <sub>3</sub>                | 439                                      | 99                                     | 0.1 M KOH   | 784                                             | 8         |
| NCMC                                             | 290                                      | 73                                     | 1 M KOH     | 280                                             | 9         |
| Co/MoC@N-C                                       | 290                                      | 90                                     | 1 M KOH     | 455                                             | 10        |
| Ni <sub>3</sub> S <sub>2</sub>                   | 295                                      | 52                                     | 1 M KOH     | 600                                             | 11        |
| NiFeZr MOFs-0.12                                 | 288                                      | 66                                     | 1 M KOH     | 250                                             | 12        |
| CoP NFs                                          | 323                                      | 49.6                                   | 1 M KOH     | 265                                             | 13        |
| Ni-MOF@CNT                                       | 370                                      | 138.2                                  | 1 M KOH     | 1000                                            | 14        |
| CoP/NCNHP                                        | 310                                      | 70                                     | 1 M KOH     | 400                                             | 15        |
| NiCu-MOF                                         | 290                                      | 169                                    | 1 M KOH     | 2000                                            | 16        |
| Co <sub>3</sub> S <sub>4</sub> @MoS <sub>2</sub> | 280                                      | 43                                     | 1 M KOH     | 283                                             | 17        |
| NiFe-HXR                                         | 289                                      | 43                                     | 1 M KOH     | 150                                             | 18        |
| Fe <sub>2</sub> /Co <sub>1</sub> GNCL            | 350                                      | 70                                     | 1 M KOH     | 255                                             | 19        |
| NiFe MOF OM NFH                                  | 270                                      | 123                                    | 1 M KOH     | 400                                             | 20        |
| W <sub>2</sub> N/WC                              | 320                                      | 94.5                                   | 1 M KOH     | 200                                             | 21        |
| Mo-Co <sub>3</sub> O <sub>4</sub> /CNTs          | 280                                      | 63                                     | 1 M KOH     | 250                                             | 22        |
| CoFeBiP                                          | 273                                      | 77.3                                   | 1 M KOH     | 300                                             | 23        |
| VC-MOF-Fe                                        | 339                                      | 78                                     | 1 M KOH     | 500                                             | 24        |
| NiPc-NiFe <sub>0.09</sub>                        | 300                                      | 55                                     | 1 M KOH     | 285                                             | 25        |
| Fe-Co <sub>3</sub> O <sub>4</sub>                | 262                                      | 43                                     | 1 M KOH     | 250                                             | 26        |

|                                         |     |      |           |      |    |
|-----------------------------------------|-----|------|-----------|------|----|
| ZIF-9(III)/Co LDH-15                    | 297 | 65   | 1 M KOH   | 189  | 27 |
| Co <sub>2</sub> P/CoNPC                 | 326 | 72.6 | 1 M KOH   | 390  | 28 |
| MOF3_A                                  | 424 | --   | 0.5 M KOH | 125  | 29 |
| Co <sub>2</sub> FeO <sub>4</sub> /NCNTs | 420 | 96.7 | 0.1 M KOH | 200  | 30 |
| aMOF-NC                                 | 249 | 39.5 | 1 M KOH   | 250  | 31 |
| Co <sub>1.5</sub> Fe <sub>0.5</sub> P   | 278 | 57   | 1 M KOH   | 250  | 32 |
| FeCo(OH) <sub>x</sub> -30               | 295 | 59   | 1 M KOH   | 255  | 33 |
| O-CoMoS                                 | 272 | 45   | 1 M KOH   | 1000 | 34 |
| (Co,0.3Ni-HMT)                          | 330 | 66   | 1 M KOH   | 182  | 35 |

**Table S3.** EIS parameters of the catalysts.

| catalysts   | R <sub>s</sub><br>(Ω) | R <sub>ct1</sub><br>(Ω) | CPE <sub>ct1</sub><br>(mF) | R <sub>ct2</sub><br>(Ω) | CPE <sub>ct2</sub><br>(mF) | R <sub>ct</sub><br>(Ω) |
|-------------|-----------------------|-------------------------|----------------------------|-------------------------|----------------------------|------------------------|
| Ni MOF      | 1.237                 | 2.829                   | 1.119                      | 457.4                   | 0.88477                    | 460.23                 |
| Ni-MOF-Fe-1 | 0.95117               | 3.748                   | 0.98628                    | 56.39                   | 0.76604                    | 60.14                  |
| Ni-MOF-Fe-2 | 1.111                 | 3.436                   | 0.95588                    | 4.878                   | 0.74285                    | 8.31                   |
| Ni-MOF-Fe-3 | 1.166                 | 2.612                   | 1.097                      | 30.84                   | 0.77259                    | 33.39                  |

Note: R<sub>ct</sub> is equal to R<sub>ct1</sub> plus to R<sub>ct2</sub>.

### 3. Reference

- [1]Zhao, Y.; Guo, Y.; Lu, X. F.; Luan, D.; Gu, X.; Lou, X. W. D., Exposing Single-Ni Atoms in Hollow S/N-doped Carbon Macroporous Fibers for Highly Efficient Electrochemical Oxygen Evolution. *Adv Mater* **2022**, e2203442.
- [2]Ahsan, M. A.; He, T.; Eid, K.; Abdullah, A. M.; Sanad, M. F.; Aldalbahi, A.; Alvarado-Tenorio, B.; Du, A.; Puente Santiago, A. R.; Noveron, J. C., Controlling the Interfacial Charge Polarization of MOF-Derived 0D-2D vdW Architectures as a Unique Strategy for Bifunctional Oxygen Electrocatalysis. *ACS Appl Mater Interfaces* **2022**, *14* (3), 3919-3929.
- [3]Karmakar, A.; Karthick, K.; Sankar, S. S.; Kumaravel, S.; Madhu, R.; Bera, K.; Dhandapani, H. N.; Nagappan, S.; Murugan, P.; Kundu, S., Stabilization of ruthenium nanoparticles over NiV-LDH surface for enhanced electrochemical water splitting: an oxygen vacancy approach. *Journal of Materials Chemistry A* **2022**, *10* (7), 3618-3632.
- [4]Meng, H. L.; Lin, S. Y.; Feng, J. J.; Zhang, L.; Wang, A. J., Coordination regulated pyrolysis synthesis of ultrafine FeNi/(FeNi)<sub>9</sub>S<sub>8</sub> nanoclusters/nitrogen, sulfur-codoped graphitic carbon nanosheets as efficient bifunctional oxygen electrocatalysts. *Journal of Colloid and Interface Science* **2022**, *610*, 573-582.
- [5]Deng, B.; Liang, J.; Yue, L. C.; Li, T. S.; Liu, Q.; Liu, Y.; Gao, S. Y.; Alshehri, A. A.; Alzahrani, K. A.; Luo, Y. L.; Sun, X. P., CoFe-LDH nanowire arrays on graphite felt: A high-performance oxygen evolution electrocatalyst in alkaline media. *Chinese Chemical Letters* **2022**, *33* (2), 890-892.
- [6]Zhang, J.; Chen, J.; Luo, Y.; Chen, Y.; Zhang, C.; Luo, Y.; Xue, Y.; Liu, H.; Wang, G.; Wang, R., Engineering heterointerfaces coupled with oxygen vacancies in lanthanum-based hollow microspheres for synergistically enhanced oxygen electrocatalysis. *Journal of Energy Chemistry* **2021**, *60*, 503-511.
- [7]Han, X.; Ling, X.; Yu, D.; Xie, D.; Li, L.; Peng, S.; Zhong, C.; Zhao, N.; Deng, Y.; Hu, W., Atomically Dispersed Binary Co-Ni Sites in Nitrogen-Doped Hollow Carbon Nanocubes for Reversible Oxygen Reduction and Evolution. *Advanced Materials* **2019**, *31* (49), e1905622.
- [8]Niu, Y.; Yuan, Y.; Zhang, Q.; Chang, F.; Yang, L.; Chen, Z.; Bai, Z., Morphology-controlled synthesis of metal-organic frameworks derived lattice plane-altered iron oxide for efficient trifunctional electrocatalysts. *Nano Energy* **2021**, *82*, 105699.
- [9]Wei, X.; Zhang, Y.; He, H.; Gao, D.; Hu, J.; Peng, H.; Peng, L.; Xiao, S.; Xiao, P., Carbon-incorporated NiO/Co<sub>3</sub>O<sub>4</sub> concave surface microcubes derived from a MOF precursor for overall water splitting. *Chemical Communications (Cambridge, England)* **2019**, *55* (46), 6515-6518.
- [10]Huang, H.; Kong, L.; Liu, M.; He, J.; Shuang, W.; Xu, Y.; Bu, X.-H., Constructing bifunctional Co/MoC@N-C catalyst via an in-situ encapsulation strategy for efficient oxygen electrocatalysis. *Journal of Energy Chemistry* **2021**, *59*, 538-546.
- [11]Zheng, X.; Han, X.; Zhang, Y.; Wang, J.; Zhong, C.; Deng, Y.; Hu, W., Controllable synthesis of nickel sulfide nanocatalysts and their phase-dependent performance for overall water splitting. *Nanoscale* **2019**, *11* (12), 5646-5654.
- [12]Wang, Y.; Tang, W.; Li, X.; Wei, D., Improving the electrocatalytic activity of NiFe bimetal-organic framework toward oxygen evolution reaction by Zr doping. *Electrochimica Acta* **2021**, *381*, 138292.



- [13] Ji, L.; Wang, J.; Teng, X.; Meyer, T. J.; Chen, Z., CoP Nanoframes as Bifunctional Electrocatalysts for Efficient Overall Water Splitting. *Acs Catalysis* **2019**, *10* (1), 412-419.
- [14] Sreekanth, T. V. M.; Dillip, G. R.; Nagajyothi, P. C.; Yoo, K.; Kim, J., Integration of Marigold 3D flower-like Ni-MOF self-assembled on MWCNTs via microwave irradiation for high-performance electrocatalytic alcohol oxidation and oxygen evolution reactions. *Applied Catalysis B: Environmental* **2021**, *285*, 119793.
- [15] Pan, Y.; Sun, K.; Liu, S.; Cao, X.; Wu, K.; Cheong, W. C.; Chen, Z.; Wang, Y.; Li, Y.; Liu, Y.; Wang, D.; Peng, Q.; Chen, C.; Li, Y., Core-Shell ZIF-8@ZIF-67-Derived CoP Nanoparticle-Embedded N-Doped Carbon Nanotube Hollow Polyhedron for Efficient Overall Water Splitting. *Journal of the American Chemical Society* **2018**, *140* (7), 2610-2618.
- [16] Gopi, S.; Al-Mohaimed, A. M.; Al-onazi, W. A.; Soliman Elshikh, M.; Yun, K., Metal organic framework-derived Ni-Cu bimetallic electrocatalyst for efficient oxygen evolution reaction. *Journal of King Saud University - Science* **2021**, *33* (3), 127352.
- [17] Guo, Y.; Tang, J.; Wang, Z.; Kang, Y.-M.; Bando, Y.; Yamauchi, Y., Elaborately assembled core-shell structured metal sulfides as a bifunctional catalyst for highly efficient electrochemical overall water splitting. *Nano Energy* **2018**, *47*, 494-502.
- [18] Lai, Y.; Xiao, L.; Tao, Y.; Gao, Z.; Zhang, L.; Su, X.; Dai, Y., Enhancing One-Dimensional Charge Transport in Metal-organic Framework Hexagonal Nanorods for Electrocatalytic Oxygen Evolution. *ChemSusChem* **2021**, *14* (8), 1830-1834.
- [19] Wei, Y. S.; Sun, L.; Wang, M.; Hong, J.; Zou, L.; Liu, H.; Wang, Y.; Zhang, M.; Liu, Z.; Li, Y.; Horike, S.; Suenaga, K.; Xu, Q., Fabricating Dual-Atom Iron Catalysts for Efficient Oxygen Evolution Reaction: A Heteroatom Modulator Approach. *Angew Chem Int Ed Engl* **2020**, *59* (37), 16013-16022.
- [20] Li, X.; Ma, D. D.; Cao, C.; Zou, R.; Xu, Q.; Wu, X. T.; Zhu, Q. L., Inlaying Ultrathin Bimetallic MOF Nanosheets into 3D Ordered Macroporous Hydroxide for Superior Electrocatalytic Oxygen Evolution. *Small* **2019**, *15* (35), 1902218.
- [21] Diao, J.; Qiu, Y.; Liu, S.; Wang, W.; Chen, K.; Li, H.; Yuan, W.; Qu, Y.; Guo, X., Interfacial Engineering of W<sub>2</sub>N/WC Heterostructures Derived from Solid-State Synthesis: A Highly Efficient Trifunctional Electrocatalyst for ORR, OER, and HER. *Adv Mater* **2020**, *32* (7), e1905679.
- [22] Lu, K.; Gu, T.; Zhang, L.; Wu, Z.; Wang, R.; Li, X., POM-assisted coating of MOF-derived Mo-doped Co<sub>3</sub>O<sub>4</sub> nanoparticles on carbon nanotubes for upgrading oxygen evolution reaction. *Chemical Engineering Journal* **2021**, *408*, 127352.
- [23] Wang, C.; Shang, H.; Wang, Y.; Li, J.; Guo, S.; Guo, J.; Du, Y., A general MOF-intermediated synthesis of hollow CoFe-based trimetallic phosphides composed of ultrathin nanosheets for boosting water oxidation electrocatalysis. *Nanoscale* **2021**, *13* (15), 7279-7284.
- [24] Hu, C.; Jin, H.; Liu, B.; Liang, L.; Wang, Z.; Chen, D.; He, D.; Mu, S., Propagating Fe-N<sub>4</sub> active sites with Vitamin C to efficiently drive oxygen electrocatalysis. *Nano Energy* **2021**, *82*, 105714.
- [25] Li, J.; Liu, P.; Mao, J.; Yan, J.; Song, W., Structural and electronic modulation of conductive MOFs for efficient oxygen evolution reaction electrocatalysis. *Journal of Materials Chemistry A* **2021**, *9* (18), 11248-11254.
- [26] Zhang, S. L.; Guan, B. Y.; Lu, X. F.; Xi, S.; Du, Y.; Lou, X. W. D., Metal Atom-Doped Co<sub>3</sub>O<sub>4</sub> Hierarchical Nanoplates for Electrocatalytic Oxygen Evolution. *Advanced Materials* **2020**, *32* (31), e2002235.

- [27]Chen, W.; Wang, C.; Su, S.; Wang, H.; Cai, D., Synthesis of ZIF-9(III)/Co LDH layered composite from ZIF-9(I) based on controllable phase transition for enhanced electrocatalytic oxygen evolution reaction. *Chemical Engineering Journal* **2021**, *414*, 128784.
- [28]Liu, H.; Guan, J.; Yang, S.; Yu, Y.; Shao, R.; Zhang, Z.; Dou, M.; Wang, F.; Xu, Q., Metal-Organic Framework-Derived Co<sub>2</sub>P Nanoparticle/Multi-Doped Porous Carbon as a Trifunctional Electrocatalyst. *Advanced Materials* **2020**, e2003649.
- [29]Bagchi, D.; Phukan, N.; Sarkar, S.; Das, R.; Ray, B.; Bellare, P.; Ravishankar, N.; Peter, S. C., Ultralow non-noble metal loaded MOF derived bi-functional electrocatalysts for the oxygen evolution and reduction reactions. *Journal of Materials Chemistry A* **2021**, *9* (14), 9319-9326.
- [30]Wang, X. T.; Ouyang, T.; Wang, L.; Zhong, J. H.; Ma, T.; Liu, Z. Q., Redox-Inert Fe<sup>(3+)</sup> Ions in Octahedral Sites of Co-Fe Spinel Oxides with Enhanced Oxygen Catalytic Activity for Rechargeable Zinc-Air Batteries. *Angewandte Chemie. International Ed. In English* **2019**, *58* (38), 13291-13296.
- [31]Liu, C.; Wang, J.; Wan, J.; Cheng, Y.; Huang, R.; Zhang, C.; Hu, W.; Wei, G.; Yu, C., Amorphous Metal-Organic Framework-Dominated Nanocomposites with Both Compositional and Structural Heterogeneity for Oxygen Evolution. *Angewandte Chemie. International Ed. In English* **2020**, *59* (9), 3630-3637.
- [32]Yang, S.; Chen, G.; Ricciardulli, A. G.; Zhang, P.; Zhang, Z.; Shi, H.; Ma, J.; Zhang, J.; Blom, P. W. M.; Feng, X., Topochemical Synthesis of Two-Dimensional Transition-Metal Phosphides Using Phosphorene Templates. *Angew Chem Int Ed Engl* **2020**, *59* (1), 465-470.
- [33]Lu, Z.; Wang, K.; Cao, Y.; Li, Y.; Jia, D., Amino-functionalized iron-based MOFs modified with 2D FeCo(OH) hybrids for boosting oxygen evolution. *Journal of Alloys and Compounds* **2021**, *871*, 159580.
- [34]Hou, J. G.; Zhang, B.; Li, Z. W.; Cao, S. Y.; Sun, Y. Q.; Wu, Y. Z.; Gao, Z. M.; Sun, L. C., Vertically Aligned Oxygenated-CoS<sub>2</sub>-MoS<sub>2</sub> Heteronanosheet Architecture from Polyoxometalate for Efficient and Stable Overall Water Splitting. *Acs Catalysis* **2018**, *8* (5), 4612-4621.
- [35]Li, Y.; Gao, Z.; Bao, H.; Zhang, B.; Wu, C.; Huang, C.; Zhang, Z.; Xie, Y.; Wang, H., Amorphous nickel-cobalt bimetal-organic framework nanosheets with crystalline motifs enable efficient oxygen evolution reaction: Ligands hybridization engineering. *Journal of Energy Chemistry* **2021**, *53*, 251-259.
